# Supplementary material for: Green, Brown, and Gray: Associations between Different Measurements of Land Patterns and Depression among Nursing Students in El Paso, Texas
Source: PubMed Central journal article supplement (PMC7662514; doi:10.3390/ijerph17218146), 2020-11-04
Supplement: ijerph-17-08146-s001.pdf [file ijerph-17-08146-s001.pdf]

**Supplementary Material**

*Land patterns examples*

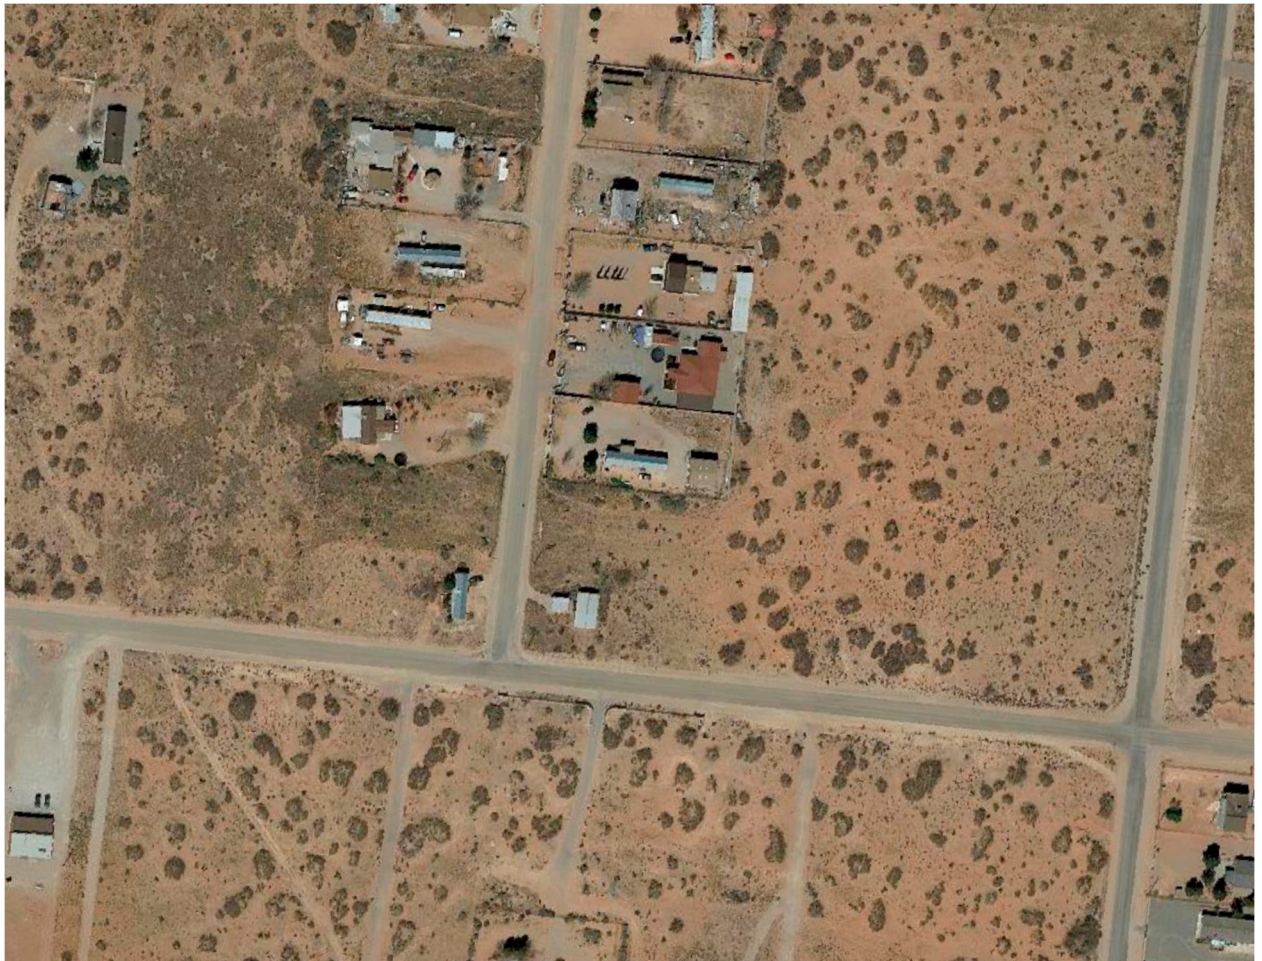

**Figure S1.** Example of relatively high brown, moderate green, low grey area



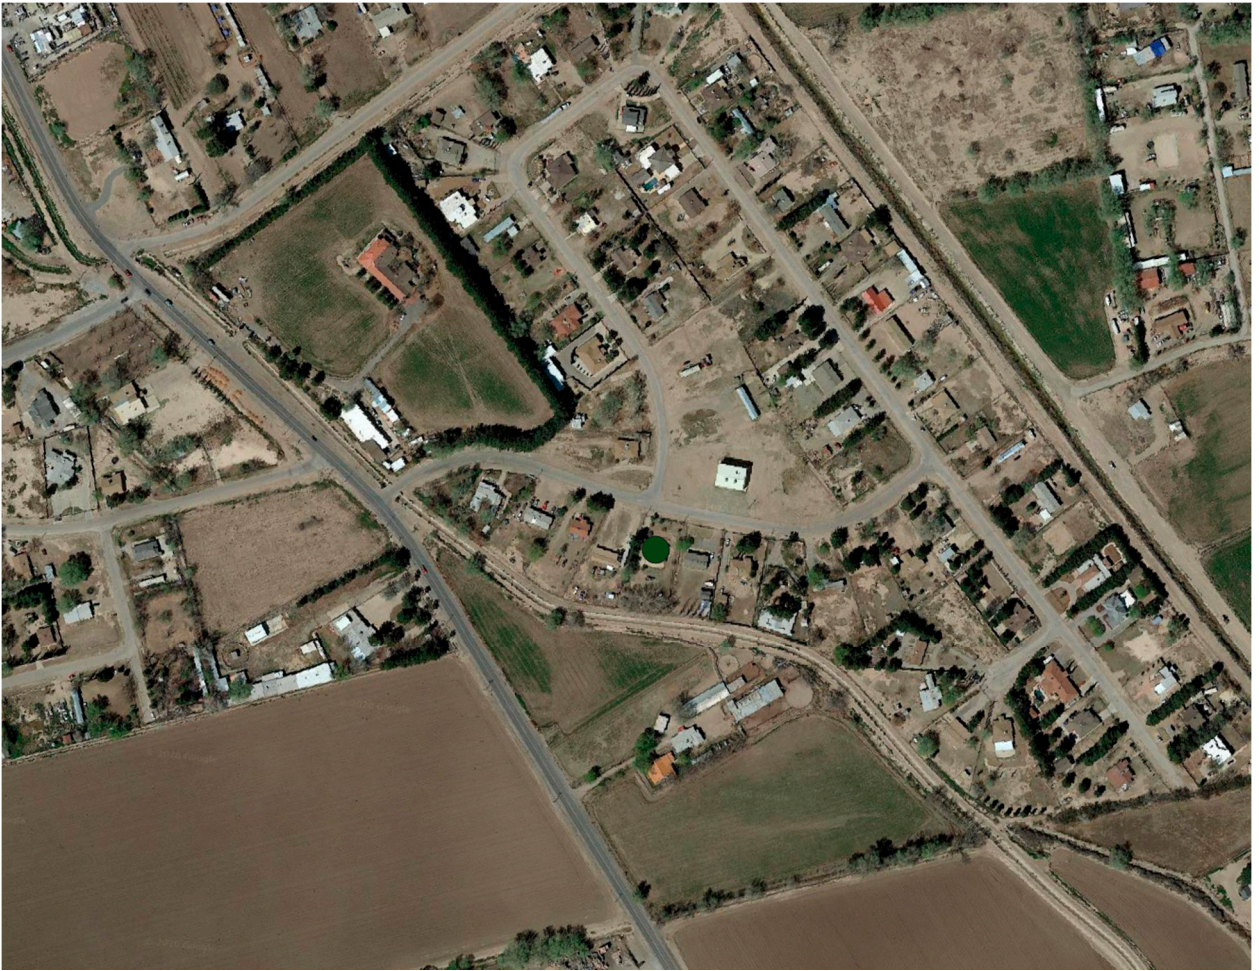

**Figure S2.** Example of relatively high brown, high green, and low grey area.



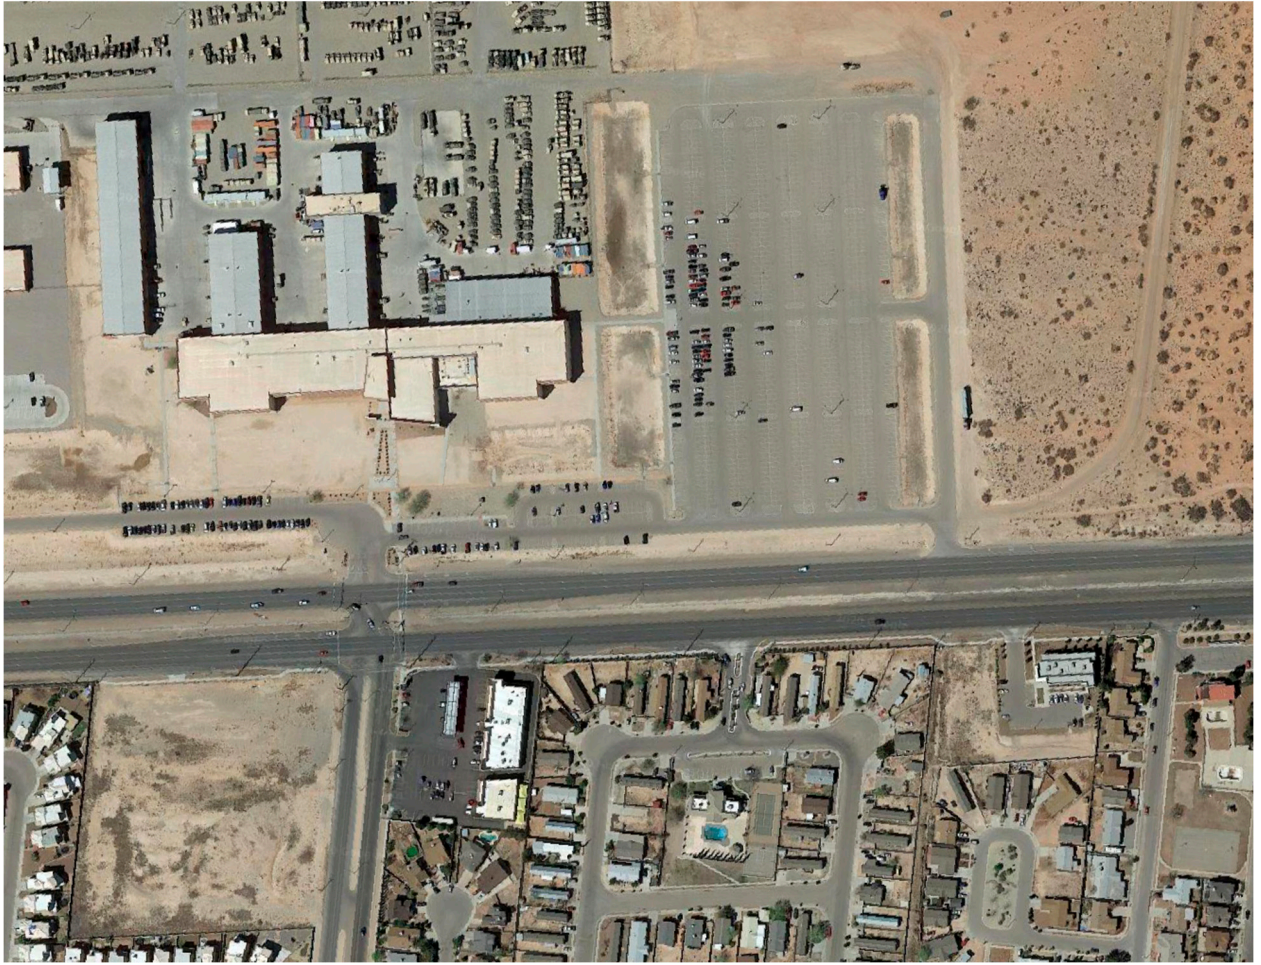

Figure S3. Example of relatively moderate brown, low green, and moderate grey area.



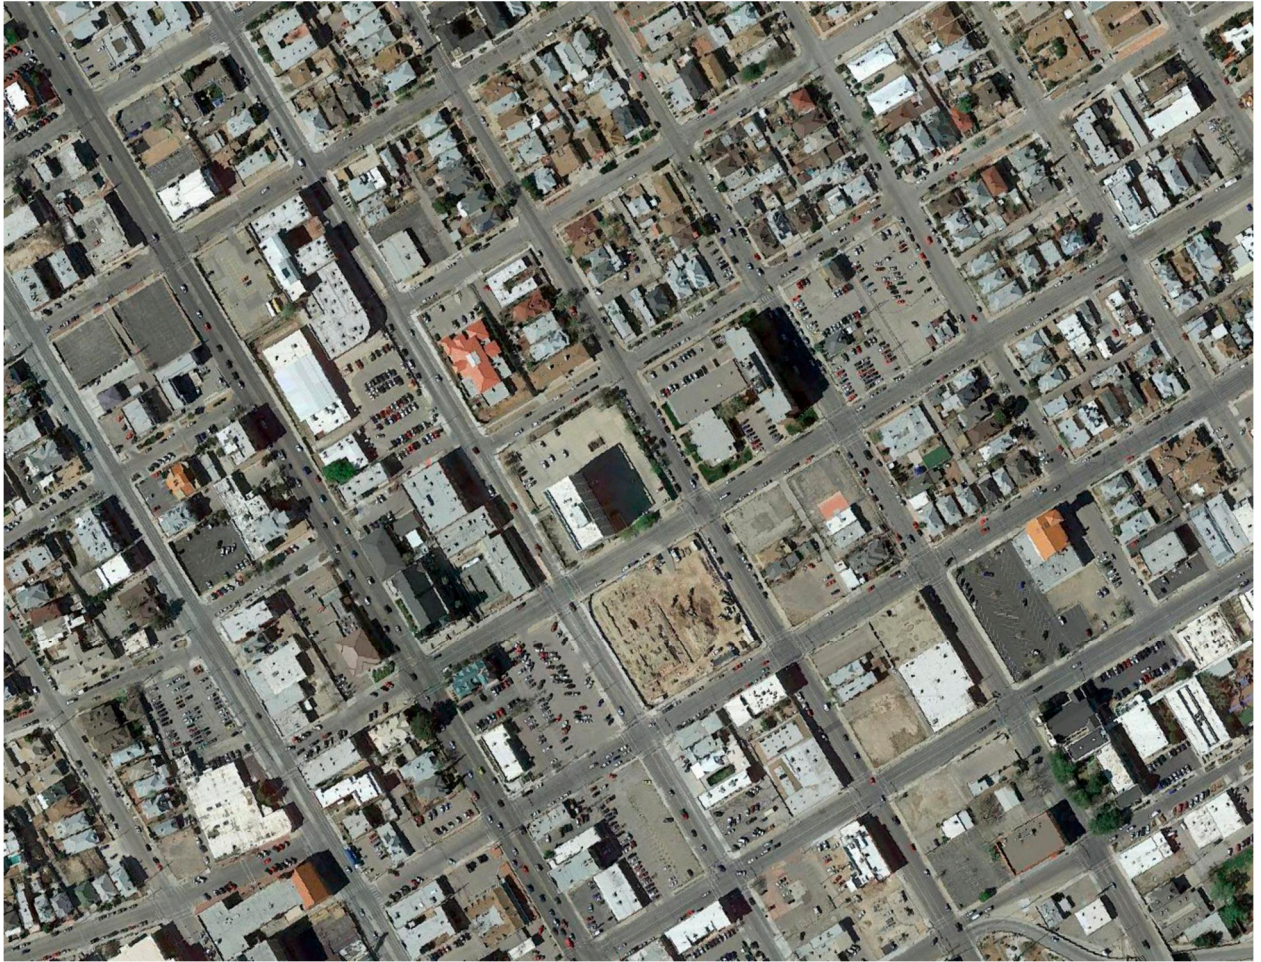

**Figure S4.** Example of relatively low brown, low green, and high grey area.



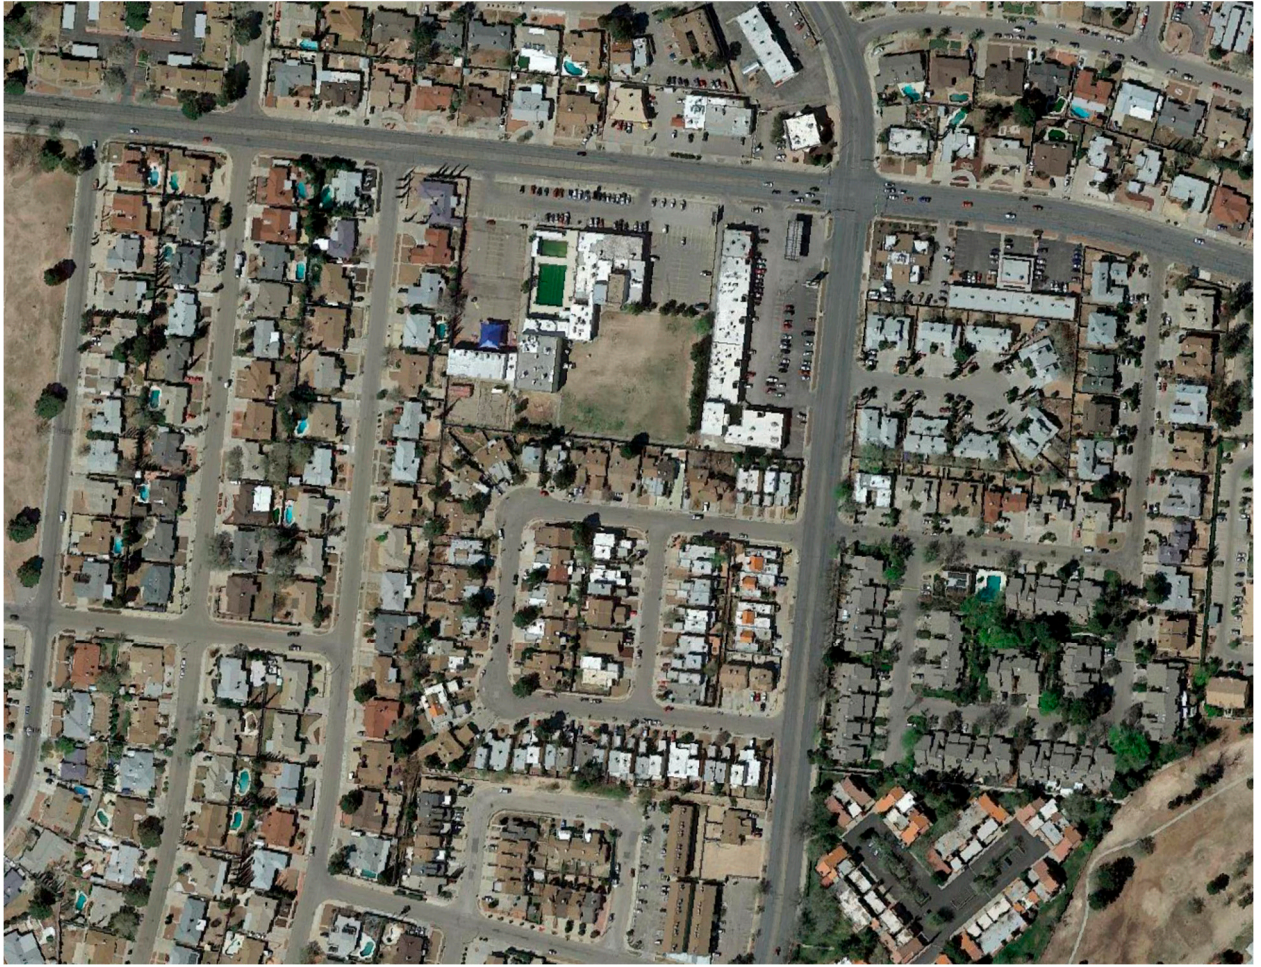

Figure S5. Example of relatively low brown, moderate green, and high grey area.



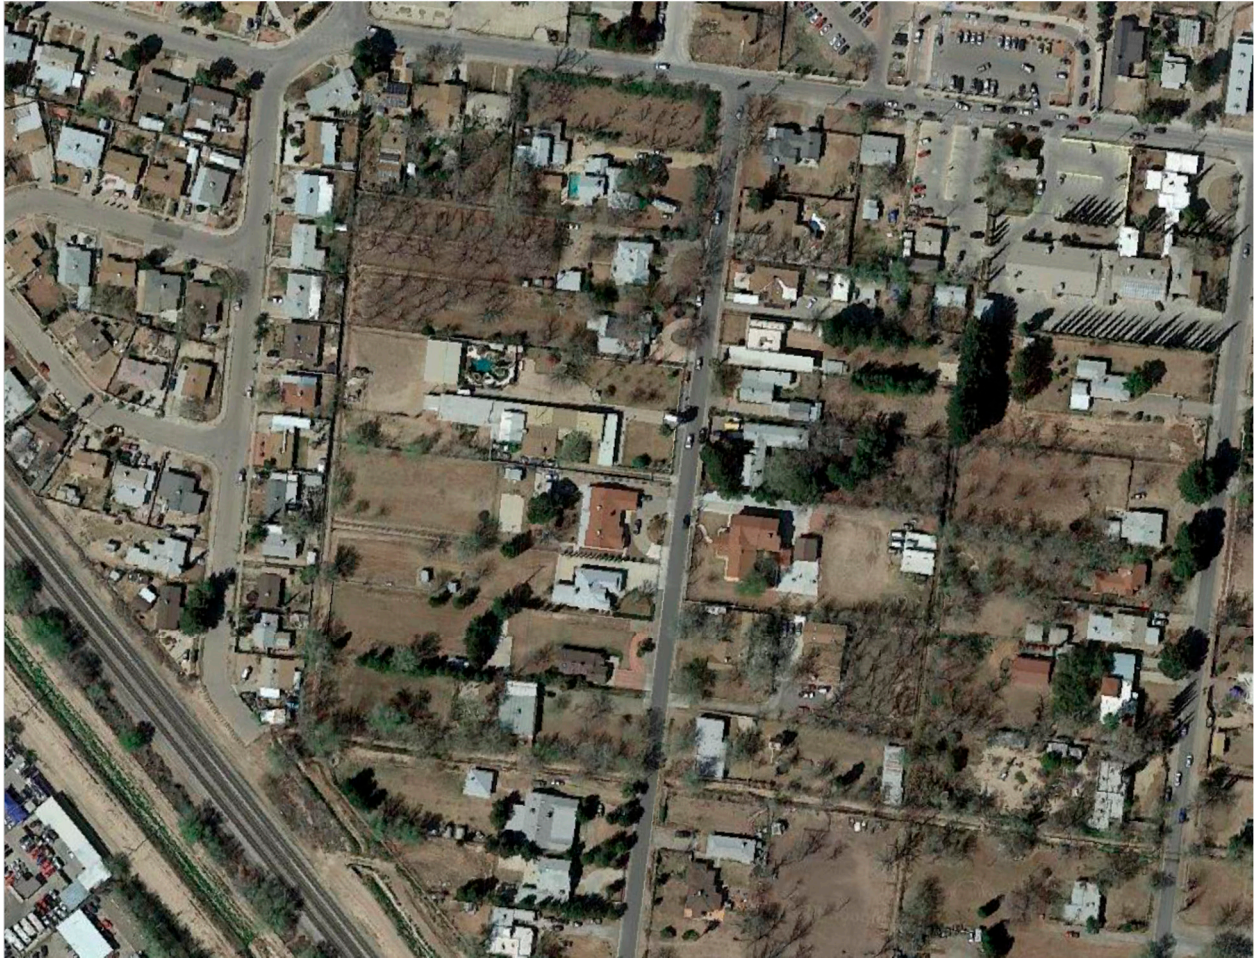

Figure S6. Example of relatively moderate brown, high green, and moderate grey area.

#### File S1

##### 1. Questions to build the social support index

1. Is there someone available to you whom you can count on to listen to you when you need to talk?
2. Is there someone available to give you good advice about a problem?
3. Is there someone available to you who shows you love and affection?
4. Is there someone available to help you with daily chores?
5. Can you count on anyone to provide you with emotional support (talking over problems or helping you make a difficult decision)?
6. Do you have as much contact as you would like with someone you feel close to, someone in whom you can trust and confide?
7. Are you currently married or living with a partner?

With the exception of question 7 in which the possible answer were 1= “yes” or 2=“no,” the other questions had the following five alternatives: 1= “None of the time,” 2= “A little of the time,” 3= “Some of the time,” 4= “Most of the time,” and 5= “All the time.”

##### 2. Questions to build the peer attachment index

1. I like to get my friend’s point of view on things I’m concerned about.
2. My friends can tell when I’m upset about something.
3. When we discuss things, my friends care about my point of view.

4. Talking over my problems with friends makes me feel ashamed or foolish.
5. I wish I had different friends.
6. My friends understand me.
7. My friends encourage me to talk about my difficulties.
8. My friends accept me as I am.
9. I feel the need to be in touch with my friends more often.
10. My friends don't understand what I'm going through these days.
11. I feel alone or apart when I am with my friends.
12. My friends listen to what I have to say.
13. I feel my friends are good friends.
14. My friends are fairly easy to talk to.
15. When I am angry about something, my friends try to be understanding.
16. My friends help me to understand myself better.
17. My friends care about how I am feeling.
18. I feel angry with my friends.
19. I can count on my friends when I need to get something off my chest.
20. I trust my friends.
21. My friends respect my feelings.
22. I get upset a lot more than my friends know about.
23. It seems as if my friends are irritated with me for no reason.
24. I can tell my friends about my problems and troubles.
25. If my friends know something is bothering me, they ask me about it.

Questions could be answered with 1= "Almost Never or Never True," 2= "Not Very Often True," 3= "Sometimes True," 4= "Often True," 5= "Almost Always or Always True."

### **3. Questions to build the physical-activity index**

DURING THE PAST YEAR, what was your average time PER WEEK spent at each of the following physical activities?

1. Standing or walking around at work or at home
2. Walking for exercise or walking for transportation or errands
3. Running or jogging
4. Bicycling (include stationary machine)
5. Ball games (basketball, football, tennis, etc.)
6. Other aerobic exercise (aerobic dance, ski machine)
7. Lap swimming
8. Other vigorous activities (e.g., mowing lawn, climbing stairs)
9. Weight training or resistance exercises
10. Meditation or yoga

Questions could be answered with 0= "0 minute," 1= "1-5 minutes," 2= "6-20 minutes," 3= "21-59 minutes," 4= "1-2 hours," 5= "3-6 hours," 6= "7-10 hours," 7= "11 hours or more."

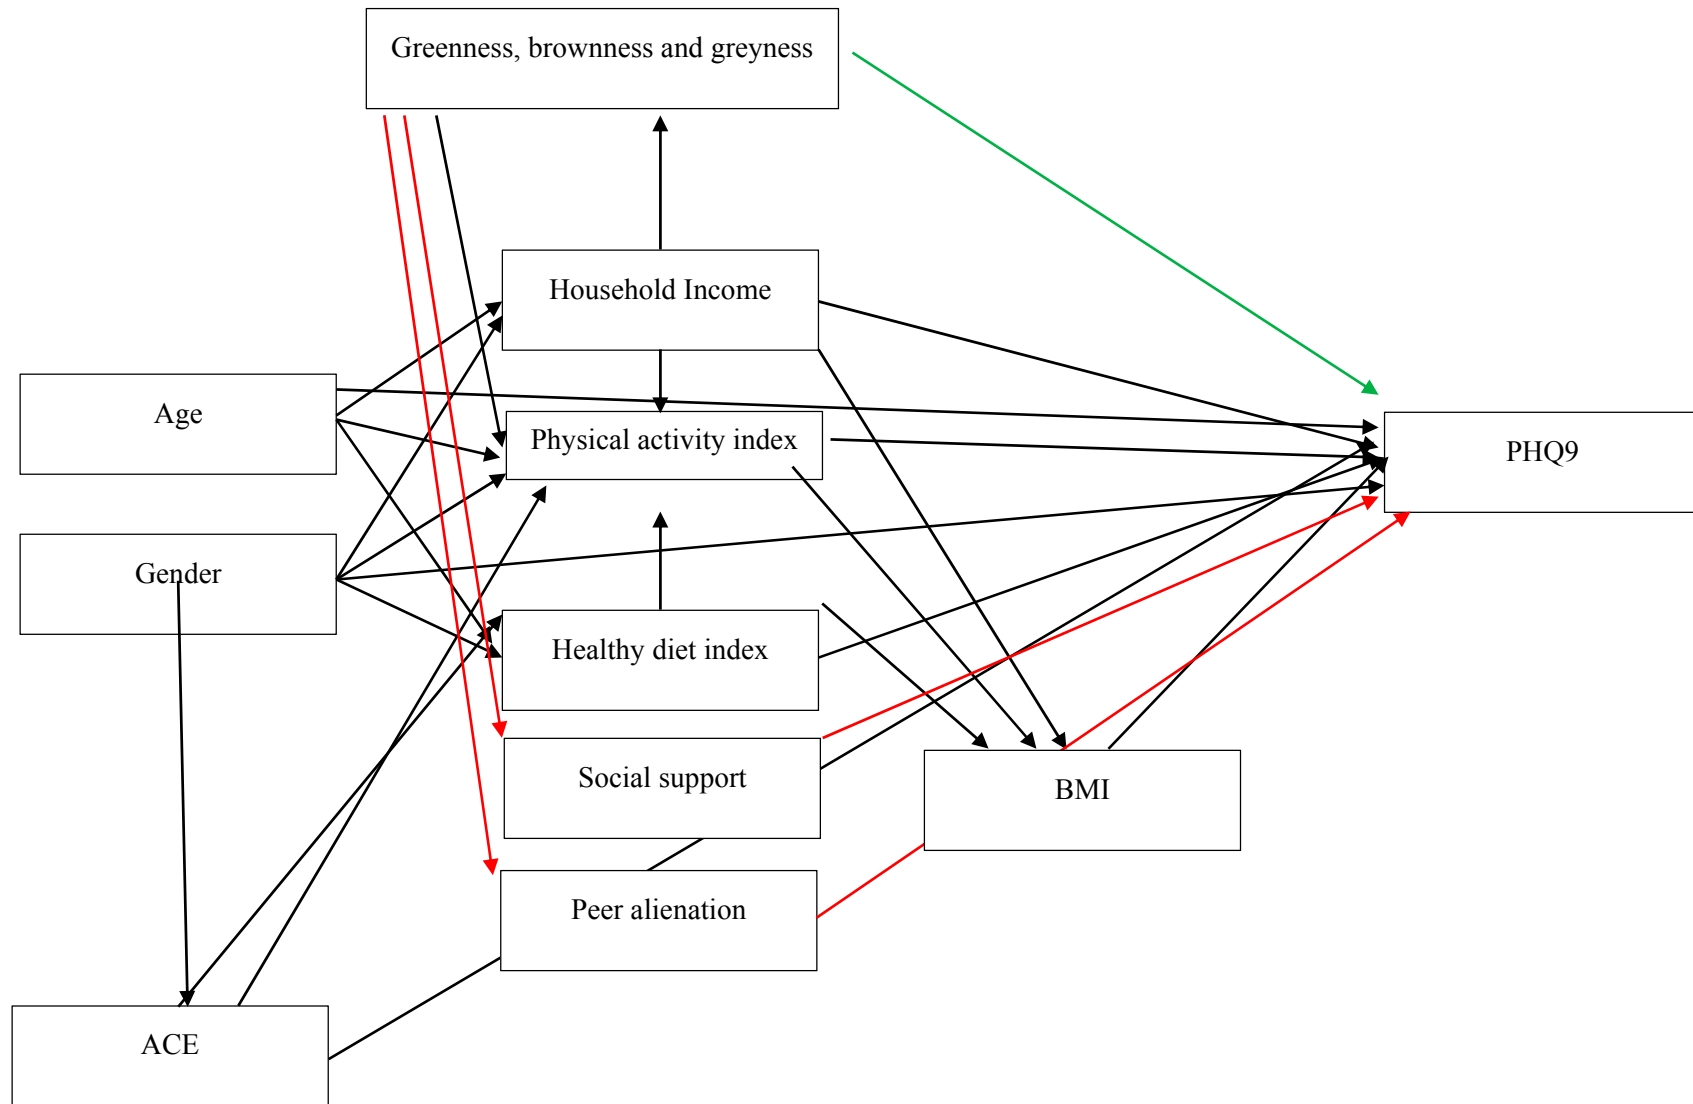



**Figure S7.** Structural equation model diagram to estimate direct and indirect associations between PHQ9 and ‘brownness and greenness’ controlling for nine covariates. (This model suggests in the green arrow a direct association which guides the presentation of the results throughout the manuscript between greenness, brownness, or greyness with depression. Red arrows capture the association between greenness, brownness or greyness over the outcome of interest, mediated by social support and peer alienation. Black arrows are both direct and indirect associations between covariates and the outcome of interest. This figure is used to present results in the manuscript.

**Table S1.** Direct effects to predict depression with greenness at 250 m with four distributions (Poisson, Negative binomial, Gamma and Normal (log of depression)) ( $n = 393$ ).

|                               | Poisson Distribution |        |        | Negative Binomial Distribution |        |        | Gamma Distribution |        |        | Normal Distribution |        |        |
|-------------------------------|----------------------|--------|--------|--------------------------------|--------|--------|--------------------|--------|--------|---------------------|--------|--------|
|                               | Coefficient          | 95% CI | 95% CI | Coefficient                    | 95% CI | 95% CI | Coefficient        | 95% CI | 95% CI | Coefficient         | 95% CI | 95% CI |
| Adverse Childhood Experiences | 0.094                | 0.076  | 0.113  | 0.086                          | 0.053  | 0.119  | 0.082              | 0.047  | 0.118  | 0.081               | 0.041  | 0.121  |
| Social support index          | -0.021               | -0.029 | -0.013 | -0.024                         | -0.039 | -0.009 | -0.025             | -0.041 | -0.008 | -0.034              | -0.052 | -0.017 |
| Attachment to peers index     | 0.038                | 0.029  | 0.047  | 0.040                          | 0.024  | 0.056  | 0.040              | 0.022  | 0.057  | 0.036               | 0.018  | 0.055  |
| Healthy-food index            | -0.022               | -0.076 | 0.032  | -0.025                         | -0.120 | 0.069  | -0.025             | -0.123 | 0.074  | -0.020              | -0.125 | 0.086  |
| Physical-index activity       | -0.087               | -0.128 | -0.045 | -0.069                         | -0.139 | 0.000  | -0.066             | -0.136 | 0.004  | -0.098              | -0.177 | -0.019 |
| Body mass index               | 0.008                | 0.001  | 0.015  | 0.009                          | -0.004 | 0.023  | 0.009              | -0.005 | 0.024  | 0.013               | -0.002 | 0.027  |
| Household income              | -0.009               | -0.016 | -0.002 | -0.009                         | -0.021 | 0.003  | -0.009             | -0.021 | 0.003  | -0.011              | -0.044 | 0.022  |
| Age                           | 0.258                | 0.150  | 0.365  | 0.279                          | 0.103  | 0.456  | 0.288              | 0.112  | 0.464  | -0.015              | -0.029 | -0.002 |
| Gender                        | -0.006               | -0.023 | 0.012  | -0.010                         | -0.040 | 0.019  | -0.012             | -0.042 | 0.018  | 0.296               | 0.102  | 0.490  |
| Greenness at 250 m            | -0.606               | -1.501 | 0.289  | -0.647                         | -2.078 | 0.785  | -0.719             | -2.135 | 0.696  | -0.671              | -2.083 | 0.741  |
| AIC                           | 2464.975             |        |        | 2144.323                       |        |        | 2118.956           |        |        | 942.4709            |        |        |
| BIC                           | 2508.687             |        |        | 2192.008                       |        |        | 2166.641           |        |        | 990.1566            |        |        |

**Table S2.** Direct effects to predict depression with greenness at 500 m with four distributions (Poisson, Negative binomial, Gamma and Normal (log of depression)) ( $n = 393$ ).

|                               | Poisson Distribution |        |        | Negative Binomial Distribution |        |        | Gamma Distribution |        |        | Normal Distribution |        |        |
|-------------------------------|----------------------|--------|--------|--------------------------------|--------|--------|--------------------|--------|--------|---------------------|--------|--------|
|                               | Coefficient          | 95%    | CI     | Coefficient                    | 95%    | CI     | Coefficient        | 95%    | CI     | Coefficient         | 95%    | CI     |
| Adverse Childhood Experiences | 0.094                | 0.075  | 0.112  | 0.085                          | 0.052  | 0.119  | 0.082              | 0.047  | 0.118  | 0.080               | 0.040  | 0.120  |
| Social support index          | -0.022               | -0.030 | -0.014 | -0.024                         | -0.039 | -0.009 | -0.025             | -0.041 | -0.008 | -0.034              | -0.052 | -0.017 |
| Attachment to peers index     | 0.038                | 0.029  | 0.047  | 0.040                          | 0.024  | 0.056  | 0.040              | 0.022  | 0.057  | 0.037               | 0.018  | 0.055  |
| Healthy-food index            | -0.023               | -0.077 | 0.031  | -0.026                         | -0.121 | 0.070  | -0.024             | -0.123 | 0.075  | -0.019              | -0.125 | 0.087  |
| Physical-index activity       | -0.087               | -0.128 | -0.045 | -0.069                         | -0.139 | 0.001  | -0.066             | -0.136 | 0.004  | -0.097              | -0.176 | -0.017 |
| Body mass index               | 0.008                | 0.000  | 0.015  | 0.009                          | -0.004 | 0.023  | 0.009              | -0.005 | 0.024  | 0.013               | -0.002 | 0.028  |
| Household income              | -0.007               | -0.024 | 0.011  | -0.011                         | -0.041 | 0.019  | -0.013             | -0.043 | 0.018  | -0.011              | -0.045 | 0.023  |
| Age                           | -0.009               | -0.016 | -0.001 | -0.009                         | -0.021 | 0.003  | -0.009             | -0.021 | 0.003  | -0.015              | -0.029 | -0.002 |
| Gender                        | 0.258                | 0.151  | 0.365  | 0.281                          | 0.105  | 0.458  | 0.289              | 0.113  | 0.466  | 0.298               | 0.104  | 0.492  |
| Greenness at 500 m            | -0.280               | -1.570 | 1.009  | -0.559                         | -2.035 | 0.917  | -0.574             | -2.088 | 0.940  | -0.629              | -2.086 | 0.829  |
| AIC                           | 2454.407             |        |        | 2135.191                       |        |        | 2109.857           |        |        | 939.8363            |        |        |
| BIC                           | 2498.035             |        |        | 2182.815                       |        |        | 2157.482           |        |        | 987.4608            |        |        |



**Table S3.** Direct effects to predict depression with greenness at 1000 m with four distributions (Poisson, Negative binomial, Gamma and Normal (log of depression)) ( $n = 393$ ).

|                               | Poisson     |        |        | Negative Binomial |        |        | Gamma       |        |        | Normal      |        |        |
|-------------------------------|-------------|--------|--------|-------------------|--------|--------|-------------|--------|--------|-------------|--------|--------|
|                               | Coefficient | 95%    | CI     | Coefficient       | 95%    | CI     | Coefficient | 95%    | CI     | Coefficient | 95%    | CI     |
| Adverse Childhood Experiences | 0.094       | 0.076  | 0.113  | 0.086             | 0.052  | 0.119  | 0.082       | 0.047  | 0.118  | 0.081       | 0.041  | 0.121  |
| Social support index          | -0.021      | -0.029 | -0.013 | -0.024            | -0.039 | -0.009 | -0.025      | -0.041 | -0.008 | -0.034      | -0.052 | -0.017 |
| Attachment to peers index     | 0.039       | 0.030  | 0.048  | 0.040             | 0.024  | 0.056  | 0.040       | 0.023  | 0.057  | 0.036       | 0.018  | 0.055  |
| Healthy-food index            | -0.022      | -0.076 | 0.032  | -0.025            | -0.120 | 0.070  | -0.024      | -0.122 | 0.075  | -0.019      | -0.125 | 0.086  |
| Physical-index activity       | -0.087      | -0.128 | -0.045 | -0.069            | -0.138 | 0.001  | -0.065      | -0.135 | 0.004  | -0.097      | -0.177 | -0.018 |
| Body mass index               | 0.008       | 0.000  | 0.015  | 0.009             | -0.004 | 0.022  | 0.009       | -0.005 | 0.023  | 0.012       | -0.003 | 0.027  |
| Household income              | -0.009      | -0.016 | -0.002 | -0.009            | -0.021 | 0.003  | -0.009      | -0.021 | 0.003  | -0.015      | -0.029 | -0.002 |
| Age                           | 0.258       | 0.150  | 0.365  | 0.280             | 0.104  | 0.456  | 0.288       | 0.112  | 0.464  | 0.298       | 0.104  | 0.492  |
| Gender                        | -0.006      | -0.024 | 0.011  | -0.010            | -0.040 | 0.019  | -0.012      | -0.042 | 0.018  | -0.011      | -0.044 | 0.022  |
| Greenness at 1000 m           | -0.570      | -1.532 | 0.392  | -0.527            | -2.054 | 1.000  | -0.522      | -2.100 | 1.056  | -0.542      | -2.037 | 0.953  |
| AIC                           | 2465.421    |        |        | 2144.648          |        |        | 2119.452    |        |        | 942.834     |        |        |
| BIC                           | 2509.133    |        |        | 2192.334          |        |        | 2167.138    |        |        | 990.520     |        |        |

**Table S4.** Direct effects to predict depression with greyness at 250 m with four distributions (Poisson, Negative binomial, Gamma and Normal (log of depression)) ( $n = 393$ ).

|                               | Poisson Distribution |        |        | Negative Binomial Distribution |        |        | Gamma Distribution |        |        | Normal Distribution |        |        |
|-------------------------------|----------------------|--------|--------|--------------------------------|--------|--------|--------------------|--------|--------|---------------------|--------|--------|
|                               | Coefficient          | 95%    | CI     | Coefficient                    | 95%    | CI     | Coefficient        | 95%    | CI     | Coefficient         | 95%    | CI     |
| Adverse Childhood Experiences | 0.095                | 0.077  | 0.114  | 0.087                          | 0.053  | 0.120  | 0.083              | 0.048  | 0.118  | 0.082               | 0.042  | 0.121  |
| Social support index          | -0.022               | -0.030 | -0.014 | -0.024                         | -0.039 | -0.009 | -0.025             | -0.041 | -0.008 | -0.034              | -0.051 | -0.017 |
| Attachment to peers index     | 0.037                | 0.028  | 0.046  | 0.038                          | 0.021  | 0.054  | 0.038              | 0.020  | 0.055  | 0.034               | 0.015  | 0.053  |
| Healthy-food index            | -0.010               | -0.064 | 0.043  | -0.015                         | -0.109 | 0.080  | -0.015             | -0.113 | 0.083  | -0.006              | -0.111 | 0.099  |
| Physical-index activity       | -0.084               | -0.125 | -0.042 | -0.066                         | -0.135 | 0.003  | -0.062             | -0.132 | 0.007  | -0.094              | -0.173 | -0.015 |
| Body mass index               | 0.008                | 0.000  | 0.015  | 0.009                          | -0.004 | 0.022  | 0.009              | -0.005 | 0.023  | 0.012               | -0.002 | 0.027  |
| Household income              | -0.008               | -0.015 | 0.000  | -0.008                         | -0.020 | 0.004  | -0.008             | -0.020 | 0.004  | -0.014              | -0.028 | -0.001 |
| Age                           | 0.267                | 0.160  | 0.374  | 0.289                          | 0.113  | 0.464  | 0.297              | 0.121  | 0.473  | 0.312               | 0.120  | 0.505  |
| Gender                        | -0.004               | -0.021 | 0.013  | -0.010                         | -0.040 | 0.019  | -0.013             | -0.044 | 0.017  | -0.009              | -0.042 | 0.024  |
| Greyness at 250 m             | 0.410                | 0.184  | 0.636  | 0.394                          | 0.009  | 0.779  | 0.379              | -0.015 | 0.774  | 0.494               | 0.064  | 0.923  |
| AIC                           | 2461.012             |        |        | 2146.044                       |        |        | 2120.929           |        |        | 941.146             |        |        |
| BIC                           | 2504.752             |        |        | 2193.760                       |        |        | 2168.645           |        |        | 988.863             |        |        |



**Table S5.** Direct effects to predict depression with greyness at 500 m with four distributions (Poisson, Negative binomial, Gamma and Normal (log of depression)) ( $n = 393$ ).

|                               | Poisson Distribution |        |        | Negative Binomial Distribution |        |        | Gamma Distribution |        |        | Normal Distribution |        |        |
|-------------------------------|----------------------|--------|--------|--------------------------------|--------|--------|--------------------|--------|--------|---------------------|--------|--------|
|                               | Coefficient          | 95%    | CI     | Coefficient                    | 95%    | CI     | Coefficient        | 95%    | CI     | Coefficient         | 95%    | CI     |
| Adverse Childhood Experiences | 0.093                | 0.075  | 0.112  | 0.086                          | 0.052  | 0.119  | 0.082              | 0.046  | 0.117  | 0.081               | 0.041  | 0.121  |
| Social support index          | -0.022               | -0.030 | -0.014 | -0.025                         | -0.040 | -0.009 | -0.026             | -0.042 | -0.009 | -0.035              | -0.052 | -0.017 |
| Attachment to peers index     | 0.036                | 0.027  | 0.045  | 0.038                          | 0.021  | 0.054  | 0.037              | 0.020  | 0.055  | 0.034               | 0.015  | 0.053  |
| Healthy-food index            | -0.016               | -0.070 | 0.038  | -0.015                         | -0.110 | 0.080  | -0.015             | -0.113 | 0.084  | -0.006              | -0.111 | 0.100  |
| Physical-index activity       | -0.084               | -0.126 | -0.043 | -0.066                         | -0.136 | 0.003  | -0.063             | -0.133 | 0.007  | -0.093              | -0.172 | -0.014 |
| Body mass index               | 0.007                | 0.000  | 0.015  | 0.009                          | -0.004 | 0.022  | 0.009              | -0.005 | 0.023  | 0.012               | -0.002 | 0.027  |
| Household income              | -0.006               | -0.023 | 0.011  | -0.010                         | -0.040 | 0.019  | -0.013             | -0.044 | 0.017  | -0.009              | -0.043 | 0.024  |
| Age                           | -0.008               | -0.015 | -0.001 | -0.008                         | -0.020 | 0.004  | -0.008             | -0.020 | 0.004  | -0.014              | -0.028 | -0.001 |
| Gender                        | 0.266                | 0.159  | 0.373  | 0.291                          | 0.115  | 0.467  | 0.297              | 0.121  | 0.473  | 0.314               | 0.121  | 0.507  |
| Greyness at 500 m             | 0.398                | 0.171  | 0.626  | 0.398                          | 0.007  | 0.789  | 0.379              | -0.022 | 0.781  | 0.485               | 0.046  | 0.924  |
| AIC                           | 2442.714             |        |        | 2136.72                        |        |        | 2111.55            |        |        | 938.7326            |        |        |
| BIC                           | 2486.341             |        |        | 2184.375                       |        |        | 2159.205           |        |        | 986.3878            |        |        |

**Table S6.** Direct effects to predict depression with greyness at 1000 m with four distributions (Poisson, Negative binomial, Gamma and Normal (log of depression)) ( $n = 394$ ).

|                               | Poisson Distribution |        |        | Negative Binomial Distribution |        |        | Gamma Distribution |        |        | Normal Distribution |        |        |
|-------------------------------|----------------------|--------|--------|--------------------------------|--------|--------|--------------------|--------|--------|---------------------|--------|--------|
|                               | Coefficient          | 95%    | CI     | Coefficient                    | 95%    | CI     | Coefficient        | 95%    | CI     | Coefficient         | 95%    | CI     |
| Adverse Childhood Experiences | 0.095                | 0.076  | 0.113  | 0.086                          | 0.053  | 0.119  | 0.082              | 0.047  | 0.117  | 0.082               | 0.042  | 0.121  |
| Social support index          | -0.022               | -0.030 | -0.014 | -0.024                         | -0.040 | -0.009 | -0.025             | -0.042 | -0.009 | -0.035              | -0.052 | -0.017 |
| Attachment to peers index     | 0.037                | 0.028  | 0.046  | 0.038                          | 0.021  | 0.054  | 0.038              | 0.020  | 0.055  | 0.034               | 0.015  | 0.053  |
| Healthy-food index            | -0.010               | -0.064 | 0.044  | -0.015                         | -0.110 | 0.079  | -0.015             | -0.113 | 0.083  | -0.007              | -0.112 | 0.098  |
| Physical-index activity       | -0.085               | -0.126 | -0.043 | -0.066                         | -0.136 | 0.003  | -0.063             | -0.132 | 0.007  | -0.094              | -0.173 | -0.015 |
| Body mass index               | 0.007                | 0.000  | 0.015  | 0.009                          | -0.005 | 0.022  | 0.009              | -0.006 | 0.023  | 0.012               | -0.003 | 0.027  |
| Household income              | -0.008               | -0.015 | -0.001 | -0.008                         | -0.020 | 0.004  | -0.008             | -0.020 | 0.004  | -0.015              | -0.028 | -0.001 |
| Age                           | 0.265                | 0.158  | 0.372  | 0.287                          | 0.111  | 0.463  | 0.294              | 0.118  | 0.470  | 0.309               | 0.117  | 0.502  |
| Gender                        | -0.004               | -0.021 | 0.013  | -0.009                         | -0.039 | 0.020  | -0.012             | -0.042 | 0.018  | -0.009              | -0.042 | 0.024  |
| Greyness at 1000 m            | 0.362                | 0.141  | 0.582  | 0.345                          | -0.037 | 0.727  | 0.328              | -0.067 | 0.722  | 0.419               | -0.012 | 0.850  |
| AIC                           | 2463.552             |        |        | 2146.918                       |        |        | 2121.783           |        |        | 942.5754            |        |        |
| BIC                           | 2507.292             |        |        | 2194.634                       |        |        | 2169.499           |        |        | 990.2916            |        |        |



**Table S7.** Direct effects to predict depression with brownness at 250 m with four distributions (Poisson, Negative binomial, Gamma and Normal (log of depression)) ( $n = 393$ ).

|                               | <b>Poisson distribution</b> |       |       | <b>Negative binomial distribution</b> |       |       | <b>Gamma distribution</b> |       |       | <b>Normal distribution</b> |       |       |
|-------------------------------|-----------------------------|-------|-------|---------------------------------------|-------|-------|---------------------------|-------|-------|----------------------------|-------|-------|
|                               | Coefficient                 | 95%   | CI    | Coefficient                           | 95%   | CI    | Coefficient               | 95%   | CI    | Coefficient                | 95%   | CI    |
| Adverse Childhood Experiences | 0.10                        | 0.08  | 0.11  | 0.09                                  | 0.05  | 0.12  | 0.08                      | 0.05  | 0.12  | 0.08                       | 0.04  | 0.12  |
| Social support index          | -0.02                       | -0.03 | -0.01 | -0.02                                 | -0.04 | -0.01 | -0.02                     | -0.04 | -0.01 | -0.03                      | -0.05 | -0.02 |
| Attachment to peers index     | 0.04                        | 0.03  | 0.05  | 0.04                                  | 0.02  | 0.05  | 0.04                      | 0.02  | 0.06  | 0.03                       | 0.02  | 0.05  |
| Healthy-food index            | -0.01                       | -0.07 | 0.04  | -0.02                                 | -0.11 | 0.08  | -0.02                     | -0.12 | 0.08  | -0.01                      | -0.12 | 0.09  |
| Physical-index activity       | -0.08                       | -0.12 | -0.04 | -0.07                                 | -0.13 | 0.00  | -0.06                     | -0.13 | 0.01  | -0.09                      | -0.17 | -0.01 |
| Body mass index               | 0.01                        | 0.00  | 0.01  | 0.01                                  | 0.00  | 0.02  | 0.01                      | -0.01 | 0.02  | 0.01                       | 0.00  | 0.03  |
| Household income              | 0.00                        | -0.02 | 0.01  | -0.01                                 | -0.04 | 0.02  | -0.01                     | -0.04 | 0.02  | -0.01                      | -0.04 | 0.02  |
| Age                           | -0.01                       | -0.01 | 0.00  | -0.01                                 | -0.02 | 0.00  | -0.01                     | -0.02 | 0.00  | -0.01                      | -0.03 | 0.00  |
| Gender                        | 0.27                        | 0.17  | 0.38  | 0.29                                  | 0.12  | 0.47  | 0.30                      | 0.12  | 0.48  | 0.32                       | 0.13  | 0.51  |
| Brownness at 250 m            | -0.37                       | -0.60 | -0.14 | -0.36                                 | -0.75 | 0.04  | -0.34                     | -0.75 | 0.06  | -0.43                      | -0.87 | 0.00  |
| AIC                           | 2456.603                    |       |       | 2141.956                              |       |       | 2117.106                  |       |       | 939.5244                   |       |       |
| BIC                           | 2500.315                    |       |       | 2189.642                              |       |       | 2164.792                  |       |       | 987.2101                   |       |       |

**Table S8.** Direct effects to predict depression with brownness at 500 m with four distributions (Poisson, Negative binomial, Gamma and Normal (log of depression)) ( $n = 393$ ).

|                               | Poisson Distribution |        |        | Negative Binomial Distribution |        |        | Gamma Distribution |        |        | Normal Distribution |        |        |
|-------------------------------|----------------------|--------|--------|--------------------------------|--------|--------|--------------------|--------|--------|---------------------|--------|--------|
|                               | Coefficient          | 95%    | CI     | Coefficient                    | 95%    | CI     | Coefficient        | 95%    | CI     | Coefficient         | 95%    | CI     |
| Adverse Childhood Experiences | 0.094                | 0.075  | 0.112  | 0.086                          | 0.053  | 0.120  | 0.082              | 0.047  | 0.118  | 0.082               | 0.042  | 0.122  |
| Social support index          | -0.022               | -0.030 | -0.014 | -0.025                         | -0.040 | -0.009 | -0.026             | -0.042 | -0.009 | -0.035              | -0.052 | -0.017 |
| Attachment to peers index     | 0.036                | 0.027  | 0.045  | 0.038                          | 0.021  | 0.054  | 0.037              | 0.020  | 0.055  | 0.034               | 0.015  | 0.053  |
| Healthy-food index            | -0.015               | -0.069 | 0.040  | -0.018                         | -0.113 | 0.077  | -0.019             | -0.117 | 0.080  | -0.010              | -0.116 | 0.096  |
| Physical-index activity       | -0.085               | -0.126 | -0.043 | -0.066                         | -0.135 | 0.004  | -0.062             | -0.132 | 0.008  | -0.092              | -0.172 | -0.013 |
| Body mass index               | 0.007                | 0.000  | 0.014  | 0.008                          | -0.005 | 0.022  | 0.009              | -0.006 | 0.023  | 0.012               | -0.003 | 0.027  |
| Household income              | -0.006               | -0.023 | 0.012  | -0.010                         | -0.040 | 0.020  | -0.013             | -0.043 | 0.018  | -0.008              | -0.042 | 0.025  |
| Age                           | -0.007               | -0.015 | 0.000  | -0.008                         | -0.020 | 0.004  | -0.008             | -0.020 | 0.004  | -0.015              | -0.028 | -0.001 |
| Gender                        | 0.267                | 0.160  | 0.374  | 0.295                          | 0.119  | 0.471  | 0.300              | 0.124  | 0.477  | 0.321               | 0.127  | 0.514  |
| Brownness at 250 m            | -0.423               | -0.660 | -0.185 | -0.374                         | -0.775 | 0.027  | -0.361             | -0.774 | 0.052  | -0.436              | -0.883 | 0.010  |
| AIC                           | 2442.273             |        |        | 2132.424                       |        |        | 2107.4             |        |        | 936.9033            |        |        |
| BIC                           | 2485.901             |        |        | 2180.049                       |        |        | 2155.084           |        |        | 984.5278            |        |        |

**Table S9.** Direct effects to predict depression with brownness at 1000 m with four distributions (Poisson, Negative binomial, Gamma and Normal (log of depression)) ( $n = 393$ ).

|                               | Poisson Distribution |       |       | Negative Binomial Distribution |       |       | Gamma Distribution |       |       | Normal Distribution |       |       |
|-------------------------------|----------------------|-------|-------|--------------------------------|-------|-------|--------------------|-------|-------|---------------------|-------|-------|
|                               | Coefficient          | 95%   | CI    | Coefficient                    | 95%   | CI    | Coefficient        | 95%   | CI    | Coefficient         | 95%   | CI    |
| Adverse Childhood Experiences | 0.10                 | 0.08  | 0.11  | 0.09                           | 0.05  | 0.12  | 0.08               | 0.05  | 0.12  | 0.08                | 0.04  | 0.12  |
| Social support index          | -0.02                | -0.03 | -0.01 | -0.02                          | -0.04 | -0.01 | -0.03              | -0.04 | -0.01 | -0.03               | -0.05 | -0.02 |
| Attachment to peers index     | 0.04                 | 0.03  | 0.05  | 0.04                           | 0.02  | 0.05  | 0.04               | 0.02  | 0.05  | 0.03                | 0.01  | 0.05  |
| Healthy-food index            | -0.01                | -0.07 | 0.04  | -0.02                          | -0.11 | 0.08  | -0.02              | -0.12 | 0.08  | -0.01               | -0.12 | 0.09  |
| Physical-index activity       | -0.08                | -0.13 | -0.04 | -0.07                          | -0.14 | 0.00  | -0.06              | -0.13 | 0.01  | -0.09               | -0.17 | -0.01 |
| Body mass index               | 0.01                 | 0.00  | 0.01  | 0.01                           | -0.01 | 0.02  | 0.01               | -0.01 | 0.02  | 0.01                | 0.00  | 0.03  |
| Household income              | 0.00                 | -0.02 | 0.01  | -0.01                          | -0.04 | 0.02  | -0.01              | -0.04 | 0.02  | -0.01               | -0.04 | 0.02  |
| Age                           | -0.01                | -0.02 | 0.00  | -0.01                          | -0.02 | 0.00  | -0.01              | -0.02 | 0.00  | -0.01               | -0.03 | 0.00  |
| Gender                        | 0.27                 | 0.16  | 0.38  | 0.29                           | 0.12  | 0.47  | 0.30               | 0.12  | 0.47  | 0.32                | 0.12  | 0.51  |
| Brownness at 1000 m           | -0.34                | -0.56 | -0.11 | -0.32                          | -0.72 | 0.07  | -0.31              | -0.72 | 0.09  | -0.38               | -0.82 | 0.06  |
| AIC                           | 2458.436             |       |       | 2142.508                       |       |       | 2117.586           |       |       | 940.4785            |       |       |
| BIC                           | 2502.148             |       |       | 2190.193                       |       |       | 2165.272           |       |       | 988.1642            |       |       |



**Table S10.** Variance inflation factor to test for collinearity among variables and correlations.

Variance inflation factor

| <b>Variables in the models</b> | <b>VIF</b> | <b>1/VIF</b> |
|--------------------------------|------------|--------------|
| Greenness at 250 m             | 1.03       | 0.966211     |
| Adverse Childhood Experiences  | 1.10       | 0.863761     |
| Social support index           | 1.22       | 0.818791     |
| Attachment to peers index      | 1.15       | 0.870439     |
| Healthy–food index             | 1.09       | 0.920600     |
| Physical–index activity        | 1.08       | 0.922131     |
| Body mass index                | 1.08       | 0.921872     |
| Age                            | 1.16       | 0.863761     |
| Gender                         | 1.04       | 0.964012     |
| Income                         | 1.05       | 0.954358     |
| Mean VIF                       | 1.10       |              |

**Table S11.** Correlations among variables when considering greenness at 250 m.

|                               | <b>Depression</b> | <b>Greenness at 250 m</b> | <b>Adverse Childhood Experiences</b> | <b>Social support index</b> | <b>Attachment to peers index</b> | <b>Healthy–food index</b> | <b>Physical–index activity</b> | <b>Body mass index</b> | <b>Age</b> | <b>Gender</b> | <b>Income</b> |
|-------------------------------|-------------------|---------------------------|--------------------------------------|-----------------------------|----------------------------------|---------------------------|--------------------------------|------------------------|------------|---------------|---------------|
| Depression                    | 1                 |                           |                                      |                             |                                  |                           |                                |                        |            |               |               |
| Greenness at 250 m            | –0.0528           | 1                         |                                      |                             |                                  |                           |                                |                        |            |               |               |
| Adverse Childhood Experiences | 0.3198 *          | –0.0591                   | 1                                    |                             |                                  |                           |                                |                        |            |               |               |
| Social support index          | –0.2464 *         | –0.0078                   | –0.1759 *                            | 1                           |                                  |                           |                                |                        |            |               |               |
| Attachment to peers index     | 0.2994 *          | –0.0141                   | 0.0935                               | –0.3111 *                   | 1                                |                           |                                |                        |            |               |               |
| Healthy–food index            | –0.0041           | –0.0648                   | 0.023                                | 0.0919                      | 0                                | 1                         |                                |                        |            |               |               |
| Physical–index activity       | –0.0559           | –0.0566                   | –0.0137                              | 0.0698                      | –0.016                           | 0.2183 *                  | 1                              |                        |            |               |               |
| Body mass index               | 0.0788            | 0.0888                    | 0.0893                               | –0.0031                     | –0.0021                          | 0.0019                    | –0.1228                        | 1                      |            |               |               |
| Age                           | –0.0101           | –0.0169                   | 0.1213                               | –0.1882*                    | –0.0639                          | 0.1235                    | –0.1346*                       | 0.2284*                | 1          |               |               |
| Gender                        | 0.0989            | –0.0857                   | 0.0589                               | 0.1189                      | –0.0212                          | 0.0413                    | –0.0809                        | –0.0199                | 0.018      | 1             |               |

|        |         |        |          |        |         |        |         |        |         |         |   |
|--------|---------|--------|----------|--------|---------|--------|---------|--------|---------|---------|---|
| Income | -0.0853 | -0.053 | -0.1796* | 0.0599 | -0.0562 | 0.0012 | -0.0228 | 0.0083 | -0.0564 | -0.0448 | 1 |
|--------|---------|--------|----------|--------|---------|--------|---------|--------|---------|---------|---|

Table S12. Correlations among variables when considering greenness at 500 m.

|                               | Depression | Greenness at 500 m | Adverse Childhood Experiences | Social support index | Attachment to peers index | Healthy-food index | Physical-index activity | Body mass index | Age     | Gender  | Income |
|-------------------------------|------------|--------------------|-------------------------------|----------------------|---------------------------|--------------------|-------------------------|-----------------|---------|---------|--------|
| Depression                    | 1          |                    |                               |                      |                           |                    |                         |                 |         |         |        |
| Greenness at 500 m            | -0.0407    | 1                  |                               |                      |                           |                    |                         |                 |         |         |        |
| Adverse Childhood Experiences | 0.3198 *   | -0.0683            | 1                             |                      |                           |                    |                         |                 |         |         |        |
| Social support index          | -0.2464 *  | -0.0323            | -0.1759 *                     | 1                    |                           |                    |                         |                 |         |         |        |
| Attachment to peers index     | 0.2994 *   | 0.0119             | 0.0935                        | -0.3111 *            | 1                         |                    |                         |                 |         |         |        |
| Healthy-food index            | -0.0041    | -0.0659            | 0.023                         | 0.0919               | 0                         | 1                  |                         |                 |         |         |        |
| Physical-index activity       | -0.0559    | -0.0513            | -0.0137                       | 0.0698               | -0.016                    | 0.2183*            | 1                       |                 |         |         |        |
| Body mass index               | 0.0788     | 0.0941             | 0.0893                        | -0.0031              | -0.0021                   | 0.0019             | -0.1228                 | 1               |         |         |        |
| Age                           | -0.0101    | 0.0003             | 0.1213                        | -0.1882 *            | -0.0639                   | 0.1235             | -0.1346 *               | 0.2284 *        | 1       |         |        |
| Gender                        | 0.0989     | -0.067             | 0.0589                        | 0.1189               | -0.0212                   | 0.0413             | -0.0809                 | -0.0199         | 0.018   | 1       |        |
| Income                        | -0.0853    | -0.0874            | -0.1796 *                     | 0.0599               | -0.0562                   | 0.0012             | -0.0228                 | 0.0083          | -0.0564 | -0.0448 | 1      |

**Table S13.** Correlations among variables when considering greenness at 1000 m.

|                               | <b>Depression</b> | <b>Greenness at 1000 m</b> | <b>Adverse Childhood Experiences</b> | <b>Social support index</b> | <b>Attachment to peers index</b> | <b>Healthy-food index</b> | <b>Physical-index activity</b> | <b>Body mass index</b> | <b>Age</b> | <b>Gender</b> | <b>Income</b> |
|-------------------------------|-------------------|----------------------------|--------------------------------------|-----------------------------|----------------------------------|---------------------------|--------------------------------|------------------------|------------|---------------|---------------|
| Depression                    | 1                 |                            |                                      |                             |                                  |                           |                                |                        |            |               |               |
| Greenness at 1000 m           | -0.0391           | 1                          |                                      |                             |                                  |                           |                                |                        |            |               |               |
| Adverse Childhood Experiences | 0.3198 *          | -0.0578                    | 1                                    |                             |                                  |                           |                                |                        |            |               |               |
| Social support index          | -0.2464 *         | -0.0188                    | -0.1759 *                            | 1                           |                                  |                           |                                |                        |            |               |               |
| Attachment to peers index     | 0.2994 *          | -0.0015                    | 0.0935                               | -0.3111 *                   | 1                                |                           |                                |                        |            |               |               |
| Healthy-food index            | -0.0041           | -0.0534                    | 0.023                                | 0.0919                      | 0                                | 1                         |                                |                        |            |               |               |
| Physical-index activity       | -0.0559           | -0.0461                    | -0.0137                              | 0.0698                      | -0.016                           | 0.2183 *                  | 1                              |                        |            |               |               |
| Body mass index               | 0.0788            | 0.0781                     | 0.0893                               | -0.0031                     | -0.0021                          | 0.0019                    | -0.1228                        | 1                      |            |               |               |
| Age                           | -0.0101           | 0.0035                     | 0.1213                               | -0.1882 *                   | -0.0639                          | 0.1235                    | -0.1346 *                      | 0.2284 *               | 1          |               |               |
| Gender                        | 0.0989            | -0.0876                    | 0.0589                               | 0.1189                      | -0.0212                          | 0.0413                    | -0.0809                        | -0.0199                | 0.018      | 1             |               |
| Income                        | -0.0853           | -0.0886                    | -0.1796 *                            | 0.0599                      | -0.0562                          | 0.0012                    | -0.0228                        | 0.0083                 | -0.0564    | -0.0448       | 1             |



**Table S14.** Correlations among variables when considering greyness at 250 m.

|                               | <b>Depression</b> | <b>Grayness at 250 m</b> | <b>Adverse Childhood Experiences</b> | <b>Social support index</b> | <b>Attachment to peers index</b> | <b>Healthy-food index</b> | <b>Physical-index activity</b> | <b>Body mass index</b> | <b>Age</b> | <b>Gender</b> | <b>Income</b> |
|-------------------------------|-------------------|--------------------------|--------------------------------------|-----------------------------|----------------------------------|---------------------------|--------------------------------|------------------------|------------|---------------|---------------|
| Depression                    | 1                 |                          |                                      |                             |                                  |                           |                                |                        |            |               |               |
| Greytness at 250 m            | 0.0887            | 1                        |                                      |                             |                                  |                           |                                |                        |            |               |               |
| Adverse Childhood Experiences | 0.3198 *          | 0.0057                   | 1                                    |                             |                                  |                           |                                |                        |            |               |               |
| Social support index          | -0.2464 *         | -0.0239                  | -0.1759 *                            | 1                           |                                  |                           |                                |                        |            |               |               |
| Attachment to peers index     | 0.2994 *          | 0.1229                   | 0.0935                               | -0.3111 *                   | 1                                |                           |                                |                        |            |               |               |
| Healthy-food index            | -0.0041           | -0.0813                  | 0.023                                | 0.0919                      | 0                                | 1                         |                                |                        |            |               |               |
| Physical-index activity       | -0.0559           | -0.0311                  | -0.0137                              | 0.0698                      | -0.016                           | 0.2183*                   | 1                              |                        |            |               |               |
| Body mass index               | 0.0788            | -0.0169                  | 0.0893                               | -0.0031                     | -0.0021                          | 0.0019                    | -0.1228                        | 1                      |            |               |               |
| Age                           | -0.0101           | -0.0685                  | 0.1213                               | -0.1882 *                   | -0.0639                          | 0.1235                    | -0.1346 *                      | 0.2284 *               | 1          |               |               |
| Gender                        | 0.0989            | -0.0566                  | 0.0589                               | 0.1189                      | -0.0212                          | 0.0413                    | -0.0809                        | -0.0199                | 0.018      | 1             |               |
| Income                        | -0.0853           | -0.0073                  | -0.1796 *                            | 0.0599                      | -0.0562                          | 0.0012                    | -0.0228                        | 0.0083                 | -0.0564    | -0.0448       | 1             |

**Table S15.** Correlations among variables when considering greyness at 500 m.

|                               | <b>Depression</b> | <b>Grayness at 500 m</b> | <b>Adverse Childhood Experiences</b> | <b>Social support index</b> | <b>Attachment to peers index</b> | <b>Healthy–food index</b> | <b>Physical–index activity</b> | <b>Body mass index</b> | <b>Age</b> | <b>Gender</b> | <b>Income</b> |
|-------------------------------|-------------------|--------------------------|--------------------------------------|-----------------------------|----------------------------------|---------------------------|--------------------------------|------------------------|------------|---------------|---------------|
| Depression                    | 1                 |                          |                                      |                             |                                  |                           |                                |                        |            |               |               |
| Greyiness at 500 m            | 0.0894            | 1                        |                                      |                             |                                  |                           |                                |                        |            |               |               |
| Adverse Childhood Experiences | 0.3198*           | 0.0228                   | 1                                    |                             |                                  |                           |                                |                        |            |               |               |
| Social support index          | -0.2464*          | 0.0039                   | -0.1759*                             | 1                           |                                  |                           |                                |                        |            |               |               |
| Attachment to peers index     | 0.2994*           | 0.1283*                  | 0.0935                               | -0.3111*                    | 1                                |                           |                                |                        |            |               |               |
| Healthy–food index            | -0.0041           | -0.0773                  | 0.023                                | 0.0919                      | 0                                | 1                         |                                |                        |            |               |               |
| Physical–index activity       | -0.0559           | -0.0369                  | -0.0137                              | 0.0698                      | -0.016                           | 0.2183*                   | 1                              |                        |            |               |               |
| Body mass index               | 0.0788            | -0.0042                  | 0.0893                               | -0.0031                     | -0.0021                          | 0.0019                    | -0.1228                        | 1                      |            |               |               |
| Age                           | -0.0101           | -0.057                   | 0.1213                               | -0.1882*                    | -0.0639                          | 0.1235                    | -0.1346*                       | 0.2284*                | 1          |               |               |
| Gender                        | 0.0989            | -0.0607                  | 0.0589                               | 0.1189                      | -0.0212                          | 0.0413                    | -0.0809                        | -0.0199                | 0.018      | 1             |               |
| Income                        | -0.0853           | 0.0028                   | -0.1796*                             | 0.0599                      | -0.0562                          | 0.0012                    | -0.0228                        | 0.0083                 | -0.0564    | -0.0448       | 1             |

**Table S16.** Correlations among variables when considering greyness at 1000 m.

|                               | <b>Depression</b> | <b>Grayness at 1000 m</b> | <b>Adverse Childhood Experiences</b> | <b>Social support index</b> | <b>Attachment to peers index</b> | <b>Healthy-food index</b> | <b>Physical-index activity</b> | <b>Body mass index</b> | <b>Age</b> | <b>Gender</b> | <b>Income</b> |
|-------------------------------|-------------------|---------------------------|--------------------------------------|-----------------------------|----------------------------------|---------------------------|--------------------------------|------------------------|------------|---------------|---------------|
| Depression                    | 1                 |                           |                                      |                             |                                  |                           |                                |                        |            |               |               |
| Greyness at 1000 m            | 0.0877            | 1                         |                                      |                             |                                  |                           |                                |                        |            |               |               |
| Adverse Childhood Experiences | 0.3198*           | 0.0252                    | 1                                    |                             |                                  |                           |                                |                        |            |               |               |
| Social support index          | -0.2464*          | -0.0073                   | -0.1759*                             | 1                           |                                  |                           |                                |                        |            |               |               |
| Attachment to peers index     | 0.2994*           | 0.1484*                   | 0.0935                               | -0.3111*                    | 1                                |                           |                                |                        |            |               |               |
| Healthy-food index            | -0.0041           | -0.0712                   | 0.023                                | 0.0919                      | 0                                | 1                         |                                |                        |            |               |               |
| Physical-index activity       | -0.0559           | -0.0476                   | -0.0137                              | 0.0698                      | -0.016                           | 0.2183*                   | 1                              |                        |            |               |               |
| Body mass index               | 0.0788            | 0.0079                    | 0.0893                               | -0.0031                     | -0.0021                          | 0.0019                    | -0.1228                        | 1                      |            |               |               |
| Age                           | -0.0101           | -0.0364                   | 0.1213                               | -0.1882*                    | -0.0639                          | 0.1235                    | -0.1346*                       | 0.2284*                | 1          |               |               |
| Gender                        | 0.0989            | -0.0276                   | 0.0589                               | 0.1189                      | -0.0212                          | 0.0413                    | -0.0809                        | -0.0199                | 0.018      | 1             |               |
| Income                        | -0.0853           | -0.0062                   | -0.1796*                             | 0.0599                      | -0.0562                          | 0.0012                    | -0.0228                        | 0.0083                 | -0.0564    | -0.0448       | 1             |



**Table S17.** Correlations among variables when considering brownness at 250 m.

|                               | <b>Depression</b> | <b>Brownness at 250 m</b> | <b>Adverse Childhood Experiences</b> | <b>Social support index</b> | <b>Attachment to peers index</b> | <b>Healthy–food index</b> | <b>Physical–index activity</b> | <b>Body mass index</b> | <b>Age</b> | <b>Gender</b> | <b>Income</b> |
|-------------------------------|-------------------|---------------------------|--------------------------------------|-----------------------------|----------------------------------|---------------------------|--------------------------------|------------------------|------------|---------------|---------------|
| Depression                    | 1                 |                           |                                      |                             |                                  |                           |                                |                        |            |               |               |
| Brownness at 250 m            | 0.0887            | 1                         |                                      |                             |                                  |                           |                                |                        |            |               |               |
| Adverse Childhood Experiences | 0.3198*           | 0.0057                    | 1                                    |                             |                                  |                           |                                |                        |            |               |               |
| Social support index          | –0.2464*          | –0.0239                   | –0.1759*                             | 1                           |                                  |                           |                                |                        |            |               |               |
| Attachment to peers index     | 0.2994*           | 0.1229                    | 0.0935                               | –0.3111*                    | 1                                |                           |                                |                        |            |               |               |
| Healthy–food index            | –0.0041           | –0.0813                   | 0.023                                | 0.0919                      | 0                                | 1                         |                                |                        |            |               |               |
| Physical–index activity       | –0.0559           | –0.0311                   | –0.0137                              | 0.0698                      | –0.016                           | 0.2183*                   | 1                              |                        |            |               |               |
| Body mass index               | 0.0788            | –0.0169                   | 0.0893                               | –0.0031                     | –0.0021                          | 0.0019                    | –0.1228                        | 1                      |            |               |               |
| Age                           | –0.0101           | –0.0685                   | 0.1213                               | –0.1882*                    | –0.0639                          | 0.1235                    | –0.1346*                       | 0.2284*                | 1          |               |               |
| Gender                        | 0.0989            | –0.0566                   | 0.0589                               | 0.1189                      | –0.0212                          | 0.0413                    | –0.0809                        | –0.0199                | 0.018      | 1             |               |
| Income                        | –0.0853           | –0.0073                   | –0.1796*                             | 0.0599                      | –0.0562                          | 0.0012                    | –0.0228                        | 0.0083                 | –0.0564    | –0.0448       | 1             |

**Table S18.** Correlations among variables when considering brownness at 500 m.

|                               | <b>Depression</b> | <b>Brownness at 500 m</b> | <b>Adverse Childhood Experiences</b> | <b>Social support index</b> | <b>Attachment to peers index</b> | <b>Healthy–food index</b> | <b>Physical–index activity</b> | <b>Body mass index</b> | <b>Age</b> | <b>Gender</b> | <b>Income</b> |
|-------------------------------|-------------------|---------------------------|--------------------------------------|-----------------------------|----------------------------------|---------------------------|--------------------------------|------------------------|------------|---------------|---------------|
| Depression                    | 1                 |                           |                                      |                             |                                  |                           |                                |                        |            |               |               |
| Brownness at 500 m            | 0.0894            | 1                         |                                      |                             |                                  |                           |                                |                        |            |               |               |
| Adverse Childhood Experiences | 0.3198*           | 0.0228                    | 1                                    |                             |                                  |                           |                                |                        |            |               |               |
| Social support index          | –0.2464*          | 0.0039                    | –0.1759*                             | 1                           |                                  |                           |                                |                        |            |               |               |

|                           |         |         |          |          |         |         |          |         |         |         |   |
|---------------------------|---------|---------|----------|----------|---------|---------|----------|---------|---------|---------|---|
| Attachment to peers index | 0.2994* | 0.1283* | 0.0935   | -0.3111* | 1       |         |          |         |         |         |   |
| Healthy-food index        | -0.0041 | -0.0773 | 0.023    | 0.0919   | 0       | 1       |          |         |         |         |   |
| Physical-index activity   | -0.0559 | -0.0369 | -0.0137  | 0.0698   | -0.016  | 0.2183* | 1        |         |         |         |   |
| Body mass index           | 0.0788  | -0.0042 | 0.0893   | -0.0031  | -0.0021 | 0.0019  | -0.1228  | 1       |         |         |   |
| Age                       | -0.0101 | -0.057  | 0.1213   | -0.1882* | -0.0639 | 0.1235  | -0.1346* | 0.2284* | 1       |         |   |
| Gender                    | 0.0989  | -0.0607 | 0.0589   | 0.1189   | -0.0212 | 0.0413  | -0.0809  | -0.0199 | 0.018   | 1       |   |
| Income                    | -0.0853 | 0.0028  | -0.1796* | 0.0599   | -0.0562 | 0.0012  | -0.0228  | 0.0083  | -0.0564 | -0.0448 | 1 |

**Table S19.** Correlations among variables when considering brownness at 1000 m.

|                               | <b>Depression</b> | <b>Brownness at 1000 m</b> | <b>Adverse Childhood Experiences</b> | <b>Social support index</b> | <b>Attachment to peers index</b> | <b>Healthy-food index</b> | <b>Physical-index activity</b> | <b>Body mass index</b> | <b>Age</b> | <b>Gender</b> | <b>Income</b> |
|-------------------------------|-------------------|----------------------------|--------------------------------------|-----------------------------|----------------------------------|---------------------------|--------------------------------|------------------------|------------|---------------|---------------|
| Depression                    | 1                 |                            |                                      |                             |                                  |                           |                                |                        |            |               |               |
| Brownness at 1000 m           | 0.0877            | 1                          |                                      |                             |                                  |                           |                                |                        |            |               |               |
| Adverse Childhood Experiences | 0.3198*           | 0.0252                     | 1                                    |                             |                                  |                           |                                |                        |            |               |               |
| Social support index          | -0.2464*          | -0.0073                    | -0.1759*                             | 1                           |                                  |                           |                                |                        |            |               |               |
| Attachment to peers index     | 0.2994*           | 0.1484*                    | 0.0935                               | -0.3111*                    | 1                                |                           |                                |                        |            |               |               |
| Healthy-food index            | -0.0041           | -0.0712                    | 0.023                                | 0.0919                      | 0                                | 1                         |                                |                        |            |               |               |
| Physical-index activity       | -0.0559           | -0.0476                    | -0.0137                              | 0.0698                      | -0.016                           | 0.2183*                   | 1                              |                        |            |               |               |
| Body mass index               | 0.0788            | 0.0079                     | 0.0893                               | -0.0031                     | -0.0021                          | 0.0019                    | -0.1228                        | 1                      |            |               |               |
| Age                           | -0.0101           | -0.0364                    | 0.1213                               | -0.1882*                    | -0.0639                          | 0.1235                    | -0.1346*                       | 0.2284*                | 1          |               |               |
| Gender                        | 0.0989            | -0.0276                    | 0.0589                               | 0.1189                      | -0.0212                          | 0.0413                    | -0.0809                        | -0.0199                | 0.018      | 1             |               |
| Income                        | -0.0853           | -0.0062                    | -0.1796*                             | 0.0599                      | -0.0562                          | 0.0012                    | -0.0228                        | 0.0083                 | -0.0564    | -0.0448       | 1             |

**Table S20.** Diagnostics Structural Equation Models.

|      | <b>Greenness at<br/>250 m</b> | <b>Greenness at<br/>500 m</b> | <b>Greenness at<br/>1000 m</b> | <b>Greyness at<br/>250 m</b> | <b>Greyness at<br/>500 m</b> | <b>Greyness at<br/>1000 m</b> | <b>Brownness at<br/>250 m</b> | <b>Brownness at<br/>500 m</b> | <b>Brownness at<br/>1000 m</b> |
|------|-------------------------------|-------------------------------|--------------------------------|------------------------------|------------------------------|-------------------------------|-------------------------------|-------------------------------|--------------------------------|
| SRMR | 0.059                         | 0.059                         | 0.059                          | 0.058                        | 0.059                        | 0.058                         | 0.058                         | 0.059                         | 0.058                          |
| CD   | 0.157                         | 0.155                         | 0.155                          | 0.175                        | 0.175                        | 0.179                         | 0.174                         | 0.176                         | 0.181                          |

STDR Standardized root mean squared residual; CD Coefficient of determination.

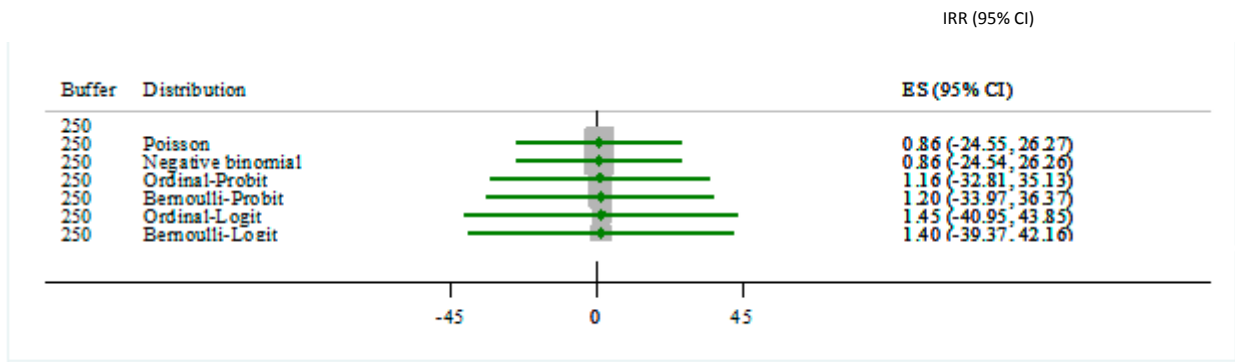

**Figure S8.** Social support as a pathway between greenness and depression (ordinal variable), in 250 m buffer.

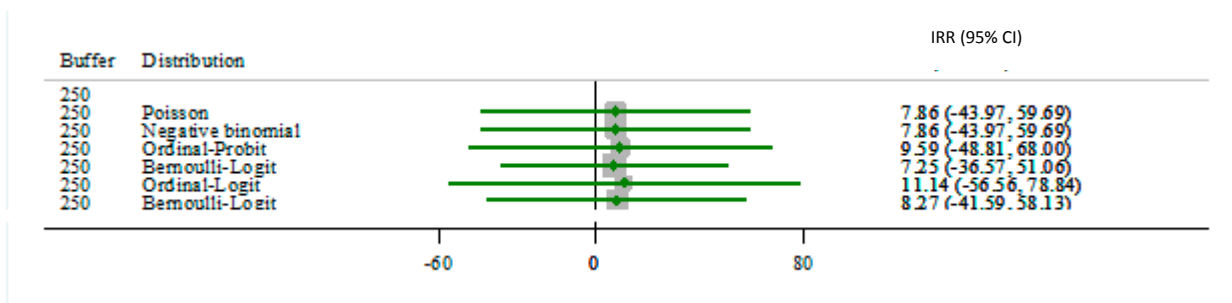

**Figure S9.** Peer alienation as a pathway between greenness and depression (ordinal variable), in 250 m buffer. Buffer indicates distances in meters around the geocoded address of residence of each study participant. Distribution indicates the distribution in which depression was modeled. When the normal distribution was assumed the values of depression were log transformed. IRR are incidence rate ratios. CI is confidence interval. All models were adjusted by Age, Sex, Healthy-food index, Physical-Activity index, Body mass index, Household income, Adverse Childhood Experiences, Social support index, and Peer alienation index.



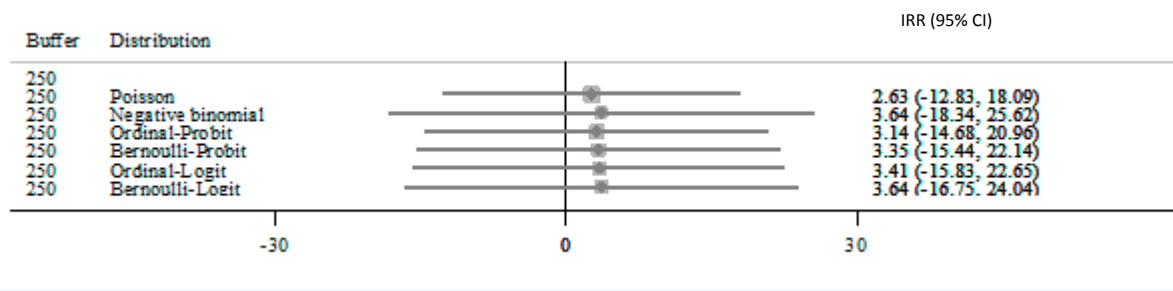

**Figure S10.** Social support as a pathway between greyness and depression (ordinal variable) in 250 m buffer.

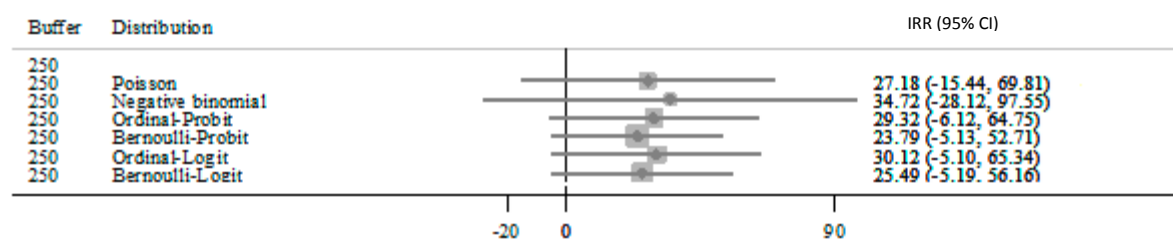

**Figure S11.** Peer alienation as a pathway between greyness and depression (ordinal variable) in 250 m buffer. Buffer indicates distances in meters around the geocoded address of residence of each study participant. Distribution indicates the distribution in which depression was modeled. When the normal distribution was assumed the values of depression were log transformed. IRR are incidence rate ratios. CI is confidence interval. All models were adjusted by Age, Sex, Healthy-food index, Physical-Activity index, Body mass index, Household income, Adverse Childhood Experiences, Social support index, and Peer alienation index.

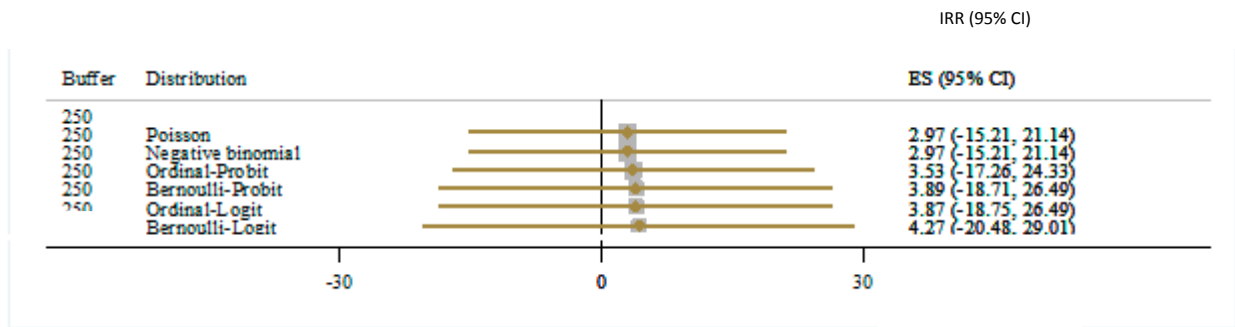

**Figure S12.** Social support as a pathway between brownness and depression (as a) continuum and b) ordinal variable) in 250 m buffer.

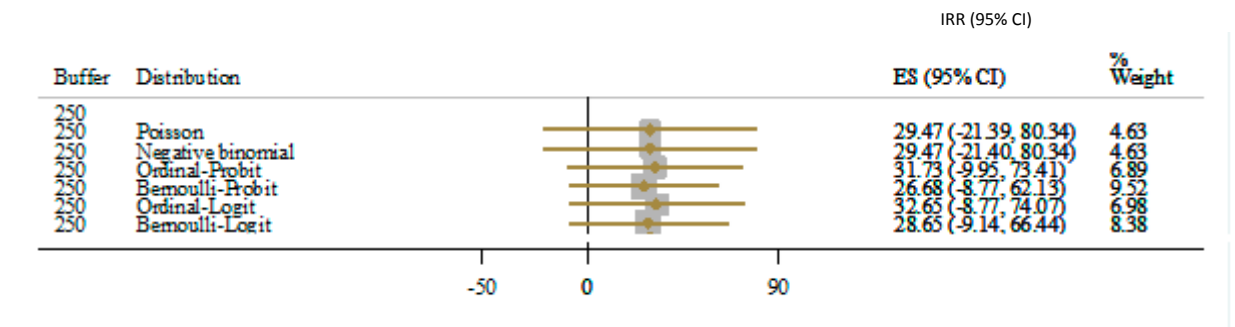

**Figure S13.** Peer alienation as a pathway between brownness and depression (as a) continuum and b) ordinal variable) in 250 m buffer. Buffer indicates distances in meters around the geocoded address of residence of each study participant. Distribution indicates the distribution in which depression was modeled. When the normal distribution was assumed the values of depression were log transformed. IRR are incidence rate ratios. CI is confidence interval. All models were adjusted by Age, Sex, Healthy-food index, Physical-Activity index, Body mass index, Household income, Adverse Childhood Experiences, Social support index, and Peer alienation index.
